# Supplementary material for: p75NTR prevents the onset of cerebellar granule cell migration via RhoA activation
Source: eLife. 2022 Aug 30;11:e79934. doi: 10.7554/eLife.79934 (PMC9427104; doi:10.7554/eLife.79934)
Supplement: Figure 2—source data 2. [file elife-79934-fig2-data2.xlsx]

## Sheet: PCNA
	Ctrl				Shh
24 h	0.17	0.23	0.15	0.25	0.51	0.54	0.21	0.89
48 h	0.1	0.06	0.04	0.07	0.48	0.38	0.29	0.53
Table Analyzed	PCNA/actin
Two-way ANOVA	Ordinary
Alpha	0.05
Source of Variation	% of total variation	P value	P value summary	Significant?
Interaction	0.02764	0.9227	ns	No
Row Factor	7.678	0.1246	ns	No
Column Factor	58.49	0.0007	***	Yes
ANOVA table	SS	DF	MS	F (DFn	DFd)	P value
Interaction	0.000225	1	0.000225	F (1	12) = 0.009813	P = 0.9227
Row Factor	0.0625	1	0.0625	F (1	12) = 2.726	P = 0.1246
Column Factor	0.4761	1	0.4761	F (1	12) = 20.76	P = 0.0007
Residual	0.2752	12	0.02293					DF
Number of missing values	0
Compare each cell mean with the other cell mean in that row.
Number of families	1
Number of comparisons per family	2
Alpha	0.05
Sidak's multiple comparisons test	Mean Diff.	95% CI of diff.	Significant?	Summary
Ctrl - Shh
24 h	-0.3375	-0.6109 to -0.06413	Yes	*
48 h	-0.3525	-0.6259 to -0.07913	Yes	*
Test details	Mean 1	Mean 2	Mean Diff.	SE of diff.	N1	N2	t	DF
Ctrl - Shh
24 h	0.2	0.5375	-0.3375	0.1071	4	4	3.152	12
48 h	0.0675	0.42	-0.3525	0.1071	4	4	3.292	12

## Sheet: p75
	Ctrl				Shh
24 h	0.14	0.27	0.28	0.34	0.79	1.14	1.16	0.96
48 h	0.13	0.103	0.23	0.16	1	1.02	0.99	1.25
Table Analyzed	P75NTR/actin
Two-way ANOVA	Ordinary
Alpha	0.05
Source of Variation	% of total variation	P value	P value summary	Significant?
Interaction	0.8031	0.215	ns	No
Row Factor	0.08187	0.6834	ns	No
Column Factor	93.49	< 0.0001	****	Yes
ANOVA table	SS	DF	MS	F (DFn	DFd)	P value
Interaction	0.02379	1	0.02379	F (1	12) = 1.714	P = 0.2150
Row Factor	0.002426	1	0.002426	F (1	12) = 0.1747	P = 0.6834
Column Factor	2.77	1	2.77	F (1	12) = 199.5	P < 0.0001
Residual	0.1666	12	0.01389
Number of missing values	0
Compare each cell mean with the other cell mean in that row.
Number of families	1
Number of comparisons per family	2
Alpha	0.05
Sidak's multiple comparisons test	Mean Diff.	95% CI of diff.	Significant?	Summary
Ctrl - Shh
24 h	-0.755	-0.9677 to -0.5423	Yes	****
48 h	-0.9093	-1.122 to -0.6965	Yes	****
Test details	Mean 1	Mean 2	Mean Diff.	SE of diff.	N1	N2	t	DF
Ctrl - Shh
24 h	0.2575	1.013	-0.755	0.08332	4	4	9.061	12
48 h	0.1558	1.065	-0.9093	0.08332	4	4	10.91	12
