# Supplementary material for: p75NTR prevents the onset of cerebellar granule cell migration via RhoA activation
Source: eLife. 2022 Aug 30;11:e79934. doi: 10.7554/eLife.79934 (PMC9427104; doi:10.7554/eLife.79934)
Supplement: Figure 2—source data 4. [file elife-79934-fig2-data4.xlsx]

## Sheet: PCNA
		shh ug/ml	0	0.1	0.5	1						0	0.1	0.5	1	0	0.1	0.5	1	0	0.1	0.5	1	0	0.1	0.5	1	0	0.1	0.5	1	0	0.1	0.5	1	0	0.1	0.5	1	0	0.1	0.5	1	0	0.1	0.5	1	0	0.1
		exp 1	0.02	0.05	0.11	0.16						0.02	0.05	0.11	0.16	0.02	0.05	0.11	0.16	0.02	0.05	0.11	0.16	0.02	0.05	0.11	0.16	0.02	0.05	0.11	0.16	0.02	0.05	0.11	0.16	0.02	0.05	0.11	0.16	0.02	0.05	0.11	0.16	0.02	0.05	0.11	0.16	0.02	0.05
		exp 2	0.03	0.05	0.15	0.2						0.03	0.05	0.15	0.2	0.03	0.05	0.15	0.2	0.03	0.05	0.15	0.2	0.03	0.05	0.15	0.2	0.03	0.05	0.15	0.2	0.03	0.05	0.15	0.2	0.03	0.05	0.15	0.2	0.03	0.05	0.15	0.2	0.03	0.05	0.15	0.2	0.03	0.05
		exp 3	0.01	0.03	0.14	0.34						0.01	0.03	0.14	0.34	0.01	0.03	0.14	0.34	0.01	0.03	0.14	0.34	0.01	0.03	0.14	0.34	0.01	0.03	0.14	0.34	0.01	0.03	0.14	0.34	0.01	0.03	0.14	0.34	0.01	0.03	0.14	0.34	0.01	0.03	0.14	0.34	0.01	0.03
Table Analyzed	PCNA/actin
ANOVA summary
F	11.78
P value	0.0026
P value summary	**
Are differences among means statistically significant? (P < 0.05)	Yes
R square	0.8154
Brown-Forsythe test
F (DFn	DFd)	1.421 (3	8)
P value	0.3065
P value summary	ns
Significantly different standard deviations? (P < 0.05)	No
Bartlett's test
Bartlett's statistic (corrected)
P value
P value summary
Significantly different standard deviations? (P < 0.05)
ANOVA table	SS	DF	MS	F (DFn	DFd)	P value
Treatment (between columns)	0.08483	3	0.02828	F (3	8) = 11.78	P = 0.0026
Residual (within columns)	0.0192	8	0.0024
Total	0.104	11
Data summary
Number of treatments (columns)	4
Number of values (total)	12
Number of families	1
Number of comparisons per family	3
Alpha	0.05
Dunnett's multiple comparisons test	Mean Diff.	95% CI of diff.	Significant?	Summary
0 vs. 0.1	-0.02333	-0.1385 to 0.09186	No	ns
0 vs. 0.5	-0.1133	-0.2285 to 0.001856	No	ns
0 vs. 1	-0.2133	-0.3285 to -0.09814	Yes	**
Test details	Mean 1	Mean 2	Mean Diff.	SE of diff.	n1	n2	q	DF
0 vs. 0.1	0.02	0.04333	-0.02333	0.04	3	3	0.5833	8
0 vs. 0.5	0.02	0.1333	-0.1133	0.04	3	3	2.833	8
0 vs. 1	0.02	0.2333	-0.2133	0.04	3	3	5.333	8
[truncated: 5,000 more columns]

## Sheet: p75
	shh ug/ml	0	0.1	0.5	1
	exp 1	0.17	0.39	0.56	0.75
	exp 2	0.11	0.45	0.6	0.66
	exp 3	0.05	0.36	0.81	0.4
Table Analyzed	p75/actin
ANOVA summary
F	12.97
P value	0.0019
P value summary	**
Are differences among means statistically significant? (P < 0.05)	Yes
R square	0.8295
Brown-Forsythe test
F (DFn	DFd)	0.6044 (3	8)
P value	0.6303
P value summary	ns
Significantly different standard deviations? (P < 0.05)	No
Bartlett's test
Bartlett's statistic (corrected)
P value
P value summary
Significantly different standard deviations? (P < 0.05)
ANOVA table	SS	DF	MS	F (DFn	DFd)	P value
Treatment (between columns)	0.5523	3	0.1841	F (3	8) = 12.97	P = 0.0019
Residual (within columns)	0.1135	8	0.01419
Total	0.6658	11
Data summary
Number of treatments (columns)	4
Number of values (total)	12
Number of families	1
Number of comparisons per family	3
Alpha	0.05
Dunnett's multiple comparisons test	Mean Diff.	95% CI of diff.	Significant?	Summary
0 vs. 0.1	-0.29	-0.5701 to -0.009893	Yes	*
0 vs. 0.5	-0.5467	-0.8268 to -0.2666	Yes	**
0 vs. 1	-0.4933	-0.7734 to -0.2132	Yes	**
Test details	Mean 1	Mean 2	Mean Diff.	SE of diff.	n1	n2	q	DF
0 vs. 0.1	0.11	0.4	-0.29	0.09727	3	3	2.981	8
0 vs. 0.5	0.11	0.6567	-0.5467	0.09727	3	3	5.62	8
0 vs. 1	0.11	0.6033	-0.4933	0.09727	3	3	5.072	8
