# Supplementary material for: p75NTR prevents the onset of cerebellar granule cell migration via RhoA activation
Source: eLife. 2022 Aug 30;11:e79934. doi: 10.7554/eLife.79934 (PMC9427104; doi:10.7554/eLife.79934)
Supplement: Figure 2—source data 5. [file elife-79934-fig2-data5.xlsx]

## Sheet: Ki67+p75-Ki67
shh ug/ml	Ctrl	0.1	0.5	1
EXP 1	0.75	0.85	0.85	0.85
EXP 2	0.84	0.96	0.92	0.97
EXP 3	0.9	0.9	0.92	0.94
Table Analyzed	Double/Ki67
ANOVA summary
F	1.317
P value	0.3346
P value summary	ns
Are differences among means statistically significant? (P < 0.05)	No
R square	0.3306
Brown-Forsythe test
F (DFn	DFd)	0.2120 (3	8)
P value	0.8854
P value summary	ns
Significantly different standard deviations? (P < 0.05)	No
Bartlett's test
Bartlett's statistic (corrected)
P value
P value summary
Significantly different standard deviations? (P < 0.05)
ANOVA table	SS	DF	MS	F (DFn	DFd)	P value
Treatment (between columns)	0.01409	3	0.004697	F (3	8) = 1.317	P = 0.3346
Residual (within columns)	0.02853	8	0.003567
Total	0.04263	11
Data summary
Number of treatments (columns)	4
Number of values (total)	12
Number of families	1
Number of comparisons per family	6
Alpha	0.05
Tukey's multiple comparisons test	Mean Diff.	95% CI of diff.	Significant?	Summary
Ctrl vs. 0.1	-0.07333	-0.2295 to 0.08282	No	ns
Ctrl vs. 0.5	-0.06667	-0.2228 to 0.08949	No	ns
Ctrl vs. 1	-0.09	-0.2462 to 0.06615	No	ns
0.1 vs. 0.5	0.006667	-0.1495 to 0.1628	No	ns
0.1 vs. 1	-0.01667	-0.1728 to 0.1395	No	ns
0.5 vs. 1	-0.02333	-0.1795 to 0.1328	No	ns
Test details	Mean 1	Mean 2	Mean Diff.	SE of diff.	n1	n2	q	DF
Ctrl vs. 0.1	0.83	0.9033	-0.07333	0.04876	3	3	2.127	8
Ctrl vs. 0.5	0.83	0.8967	-0.06667	0.04876	3	3	1.933	8
Ctrl vs. 1	0.83	0.92	-0.09	0.04876	3	3	2.61	8
0.1 vs. 0.5	0.9033	0.8967	0.006667	0.04876	3	3	0.1933	8
0.1 vs. 1	0.9033	0.92	-0.01667	0.04876	3	3	0.4834	8
0.5 vs. 1	0.8967	0.92	-0.02333	0.04876	3	3	0.6767	8

## Sheet: Ki67+p75-Dapi
shh ug/ml	Ctrl	0.1	0.5	1
exp 1	0.04	0.27	0.45	0.54
exp 2	0.08	0.29	0.46	0.42
exp 3	0.04	0.2	0.22	0.43
Table Analyzed	Double/Dapi
ANOVA summary
F	14.8
P value	0.0013
P value summary	**
Are differences among means statistically significant? (P < 0.05)	Yes
R square	0.8474
Brown-Forsythe test
F (DFn	DFd)	0.4294 (3	8)
P value	0.7376
P value summary	ns
Significantly different standard deviations? (P < 0.05)	No
Bartlett's test
Bartlett's statistic (corrected)
P value
P value summary
Significantly different standard deviations? (P < 0.05)
ANOVA table	SS	DF	MS	F (DFn	DFd)	P value
Treatment (between columns)	0.2846	3	0.09487	F (3	8) = 14.80	P = 0.0013
Residual (within columns)	0.05127	8	0.006408
Total	0.3359	11
Data summary
Number of treatments (columns)	4
Number of values (total)	12
Number of families	1
Number of comparisons per family	6
Alpha	0.05
Tukey's multiple comparisons test	Mean Diff.	95% CI of diff.	Significant?	Summary
Ctrl vs. 0.1	-0.2	-0.4093 to 0.009313	No	ns
Ctrl vs. 0.5	-0.3233	-0.5326 to -0.1140	Yes	**
Ctrl vs. 1	-0.41	-0.6193 to -0.2007	Yes	**
0.1 vs. 0.5	-0.1233	-0.3326 to 0.08598	No	ns
0.1 vs. 1	-0.21	-0.4193 to -0.0006871	Yes	*
0.5 vs. 1	-0.08667	-0.2960 to 0.1226	No	ns
Test details	Mean 1	Mean 2	Mean Diff.	SE of diff.	n1	n2	q	DF
Ctrl vs. 0.1	0.05333	0.2533	-0.2	0.06536	3	3	4.327	8
Ctrl vs. 0.5	0.05333	0.3767	-0.3233	0.06536	3	3	6.996	8
Ctrl vs. 1	0.05333	0.4633	-0.41	0.06536	3	3	8.871	8
0.1 vs. 0.5	0.2533	0.3767	-0.1233	0.06536	3	3	2.669	8
0.1 vs. 1	0.2533	0.4633	-0.21	0.06536	3	3	4.544	8
0.5 vs. 1	0.3767	0.4633	-0.08667	0.06536	3	3	1.875	8

## Sheet: Ki67-Dapi
shh ug/ml	Ctrl	0.1	0.5	1
exp 1	0.07	0.28	0.47	0.48
exp 2	0.08	0.23	0.5	0.45
exp 3	0.05	0.24	0.26	0.43
Table Analyzed	Ki67/Dapi
ANOVA summary
F	19.81
P value	0.0005
P value summary	***
Are differences among means statistically significant? (P < 0.05)	Yes
R square	0.8814
Brown-Forsythe test
F (DFn	DFd)	0.9520 (3	8)
P value	0.4604
P value summary	ns
Significantly different standard deviations? (P < 0.05)	No
Bartlett's test
Bartlett's statistic (corrected)
P value
P value summary
Significantly different standard deviations? (P < 0.05)
ANOVA table	SS	DF	MS	F (DFn	DFd)	P value
Treatment (between columns)	0.2774	3	0.09246	F (3	8) = 19.81	P = 0.0005
Residual (within columns)	0.03733	8	0.004667
Total	0.3147	11
Data summary
Number of treatments (columns)	4
Number of values (total)	12
Number of families	1
Number of comparisons per family	6
Alpha	0.05
Tukey's multiple comparisons test	Mean Diff.	95% CI of diff.	Significant?	Summary
Ctrl vs. 0.1	-0.1833	-0.3620 to -0.004715	Yes	*
Ctrl vs. 0.5	-0.3433	-0.5220 to -0.1647	Yes	**
Ctrl vs. 1	-0.3867	-0.5653 to -0.2080	Yes	***
0.1 vs. 0.5	-0.16	-0.3386 to 0.01862	No	ns
0.1 vs. 1	-0.2033	-0.3820 to -0.02471	Yes	*
0.5 vs. 1	-0.04333	-0.2220 to 0.1353	No	ns
Test details	Mean 1	Mean 2	Mean Diff.	SE of diff.	n1	n2	q	DF
Ctrl vs. 0.1	0.06667	0.25	-0.1833	0.05578	3	3	4.648	8
Ctrl vs. 0.5	0.06667	0.41	-0.3433	0.05578	3	3	8.705	8
Ctrl vs. 1	0.06667	0.4533	-0.3867	0.05578	3	3	9.804	8
0.1 vs. 0.5	0.25	0.41	-0.16	0.05578	3	3	4.057	8
0.1 vs. 1	0.25	0.4533	-0.2033	0.05578	3	3	5.155	8
0.5 vs. 1	0.41	0.4533	-0.04333	0.05578	3	3	1.099	8

## Sheet: p75-Dapi
shh ug/ml	Ctrl	0.1	0.5	1
exp 1	0.092	0.191	0.5604	0.4936
exp 2	0.059	0.2626	0.5402	0.6591
exp 3	0.069	0.32	0.49	0.472
Table Analyzed	p75NTR/Dapi
ANOVA summary
F	37.95
P value	< 0.0001
P value summary	****
Are differences among means statistically significant? (P < 0.05)	Yes
R square	0.9343
Brown-Forsythe test
F (DFn	DFd)	0.5909 (3	8)
P value	0.6381
P value summary	ns
Significantly different standard deviations? (P < 0.05)	No
Bartlett's test
Bartlett's statistic (corrected)
P value
P value summary
Significantly different standard deviations? (P < 0.05)
ANOVA table	SS	DF	MS	F (DFn	DFd)	P value
Treatment (between columns)	0.4626	3	0.1542	F (3	8) = 37.95	P < 0.0001
Residual (within columns)	0.03251	8	0.004064
Total	0.4951	11
Data summary
Number of treatments (columns)	4
Number of values (total)	12
Number of families	1
Number of comparisons per family	6
Alpha	0.05
Tukey's multiple comparisons test	Mean Diff.	95% CI of diff.	Significant?	Summary
Ctrl vs. 0.1	-0.1845	-0.3512 to -0.01785	Yes	*
Ctrl vs. 0.5	-0.4569	-0.6235 to -0.2902	Yes	***
Ctrl vs. 1	-0.4682	-0.6349 to -0.3016	Yes	****
0.1 vs. 0.5	-0.2723	-0.4390 to -0.1057	Yes	**
0.1 vs. 1	-0.2837	-0.4504 to -0.1170	Yes	**
0.5 vs. 1	-0.01137	-0.1780 to 0.1553	No	ns
Test details	Mean 1	Mean 2	Mean Diff.	SE of diff.	n1	n2	q	DF
Ctrl vs. 0.1	0.07333	0.2579	-0.1845	0.05205	3	3	5.014	8
Ctrl vs. 0.5	0.07333	0.5302	-0.4569	0.05205	3	3	12.41	8
Ctrl vs. 1	0.07333	0.5416	-0.4682	0.05205	3	3	12.72	8
0.1 vs. 0.5	0.2579	0.5302	-0.2723	0.05205	3	3	7.4	8
0.1 vs. 1	0.2579	0.5416	-0.2837	0.05205	3	3	7.708	8
0.5 vs. 1	0.5302	0.5416	-0.01137	0.05205	3	3	0.3088	8
