# Supplementary material for: p75NTR prevents the onset of cerebellar granule cell migration via RhoA activation
Source: eLife. 2022 Aug 30;11:e79934. doi: 10.7554/eLife.79934 (PMC9427104; doi:10.7554/eLife.79934)
Supplement: Figure 3—source data 1. [file elife-79934-fig3-data1.xlsx]

## Sheet: proNT3 area TUJ1
	Ctrl	SAG	SAG+pNT3-1	SAG+pNT3 10
exp 1	73.22	31.17	63.72	72.65
exp 2	98.47	31.27	57.76	68.05
exp 3	66.86	24.64	34	49.25
exp 4	55.97	26.5	41.6	51.42
Table Analyzed	proNT3 area TUJ1
ANOVA summary
F	8.812
P value	0.0023
P value summary	**
Are differences among means statistically significant? (P < 0.05)	Yes
R square	0.6878
Brown-Forsythe test
F (DFn	DFd)	1.799 (3	12)
P value	0.201
P value summary	ns
Significantly different standard deviations? (P < 0.05)	No
Bartlett's test
Bartlett's statistic (corrected)	5.464
P value	0.1408
P value summary	ns
Significantly different standard deviations? (P < 0.05)	No
ANOVA table	SS	DF	MS	F (DFn	DFd)	P value
Treatment (between columns)	4395	3	1465	F (3	12) = 8.812	P = 0.0023
Residual (within columns)	1995	12	166.2
Total	6390	15
Data summary
Number of treatments (columns)	4
Number of values (total)	16
Number of families	1
Number of comparisons per family	6
Alpha	0.05
Tukey's multiple comparisons test	Mean Diff.	95% CI of diff.	Significant?	Summary
Ctrl vs. SAG	45.24	18.17 to 72.30	Yes	**
Ctrl vs. SAG+pNT3-1	24.36	-2.708 to 51.43	No	ns
Ctrl vs. SAG+pNT3 10	13.29	-13.78 to 40.36	No	ns
SAG vs. SAG+pNT3-1	-20.88	-47.94 to 6.193	No	ns
SAG vs. SAG+pNT3 10	-31.95	-59.02 to -4.879	Yes	*
SAG+pNT3-1 vs. SAG+pNT3 10	-11.07	-38.14 to 16.00	No	ns
Test details	Mean 1	Mean 2	Mean Diff.	SE of diff.	n1	n2	q	DF
Ctrl vs. SAG	73.63	28.4	45.24	9.117	4	4	7.017	12
Ctrl vs. SAG+pNT3-1	73.63	49.27	24.36	9.117	4	4	3.779	12
Ctrl vs. SAG+pNT3 10	73.63	60.34	13.29	9.117	4	4	2.061	12
SAG vs. SAG+pNT3-1	28.4	49.27	-20.88	9.117	4	4	3.238	12
SAG vs. SAG+pNT3 10	28.4	60.34	-31.95	9.117	4	4	4.956	12
SAG+pNT3-1 vs. SAG+pNT3 10	49.27	60.34	-11.07	9.117	4	4	1.718	12

## Sheet: p75-Dapi
	Ctrl	SAG	SAG+pNT3-1	SAG+pNT3 10
exp 1	0.61	29.8	4.26	7.08
exp 2	1.04	45.07	17.68	11.16
exp 3	4.33	39.48	9.19	4.59
exp 4	2.7	19.07	10.28	4.9
Table Analyzed	proNT3 p75/dapi
ANOVA summary
F	17.71
P value	0.0001
P value summary	***
Are differences among means statistically significant? (P < 0.05)	Yes
R square	0.8157
Brown-Forsythe test
F (DFn	DFd)	4.123 (3	12)
P value	0.0317
P value summary	*
Significantly different standard deviations? (P < 0.05)	Yes
Bartlett's test
Bartlett's statistic (corrected)	9.225
P value	0.0264
P value summary	*
Significantly different standard deviations? (P < 0.05)	Yes
ANOVA table	SS	DF	MS	F (DFn	DFd)	P value
Treatment (between columns)	2301	3	767	F (3	12) = 17.71	P = 0.0001
Residual (within columns)	519.8	12	43.32
Total	2821	15
Data summary
Number of treatments (columns)	4
Number of values (total)	16
Number of families	1
Number of comparisons per family	6
Alpha	0.05
Tukey's multiple comparisons test	Mean Diff.	95% CI of diff.	Significant?	Summary
Ctrl vs. SAG	-31.19	-45.00 to -17.37	Yes	***
Ctrl vs. SAG+pNT3-1	-8.183	-22.00 to 5.634	No	ns
Ctrl vs. SAG+pNT3 10	-4.763	-18.58 to 9.054	No	ns
SAG vs. SAG+pNT3-1	23	9.186 to 36.82	Yes	**
SAG vs. SAG+pNT3 10	26.42	12.61 to 40.24	Yes	***
SAG+pNT3-1 vs. SAG+pNT3 10	3.42	-10.40 to 17.24	No	ns
Test details	Mean 1	Mean 2	Mean Diff.	SE of diff.	n1	n2	q	DF
Ctrl vs. SAG	2.17	33.36	-31.19	4.654	4	4	9.477	12
Ctrl vs. SAG+pNT3-1	2.17	10.35	-8.183	4.654	4	4	2.487	12
Ctrl vs. SAG+pNT3 10	2.17	6.933	-4.763	4.654	4	4	1.447	12
SAG vs. SAG+pNT3-1	33.36	10.35	23	4.654	4	4	6.99	12
SAG vs. SAG+pNT3 10	33.36	6.933	26.42	4.654	4	4	8.029	12
SAG+pNT3-1 vs. SAG+pNT3 10	10.35	6.933	3.42	4.654	4	4	1.039	12

## Sheet: Ki67-Dapi
	Ctrl	SAG	SAG+pNT3-1	SAG+pNT3 10
exp1	1.87	46.37	5.23	4.8
exp2	3.06	42.55	4.86	2.48
exp3	6.57	38.1	5.28	6.85
Table Analyzed	proNT3 Ki67/dapi
ANOVA summary
F	153.4
P value	< 0.0001
P value summary	****
Are differences among means statistically significant? (P < 0.05)	Yes
R square	0.9829
Brown-Forsythe test
F (DFn	DFd)	1.291 (3	8)
P value	0.342
P value summary	ns
Significantly different standard deviations? (P < 0.05)	No
Bartlett's test
Bartlett's statistic (corrected)
P value
P value summary
Significantly different standard deviations? (P < 0.05)
ANOVA table	SS	DF	MS	F (DFn	DFd)	P value
Treatment (between columns)	3215	3	1072	F (3	8) = 153.4	P < 0.0001
Residual (within columns)	55.87	8	6.984
Total	3271	11
Data summary
Number of treatments (columns)	4
Number of values (total)	12
Number of families	1
Number of comparisons per family	6
Alpha	0.05
Tukey's multiple comparisons test	Mean Diff.	95% CI of diff.	Significant?	Summary
Ctrl vs. SAG	-38.51	-45.42 to -31.60	Yes	****
Ctrl vs. SAG+pNT3-1	-1.29	-8.200 to 5.620	No	ns
Ctrl vs. SAG+pNT3 10	-0.8767	-7.787 to 6.033	No	ns
SAG vs. SAG+pNT3-1	37.22	30.31 to 44.13	Yes	****
SAG vs. SAG+pNT3 10	37.63	30.72 to 44.54	Yes	****
SAG+pNT3-1 vs. SAG+pNT3 10	0.4133	-6.497 to 7.323	No	ns
Test details	Mean 1	Mean 2	Mean Diff.	SE of diff.	n1	n2	q	DF
Ctrl vs. SAG	3.833	42.34	-38.51	2.158	3	3	25.24	8
Ctrl vs. SAG+pNT3-1	3.833	5.123	-1.29	2.158	3	3	0.8455	8
Ctrl vs. SAG+pNT3 10	3.833	4.71	-0.8767	2.158	3	3	0.5746	8
SAG vs. SAG+pNT3-1	42.34	5.123	37.22	2.158	3	3	24.39	8
SAG vs. SAG+pNT3 10	42.34	4.71	37.63	2.158	3	3	24.66	8
SAG+pNT3-1 vs. SAG+pNT3 10	5.123	4.71	0.4133	2.158	3	3	0.2709	8
