# Supplementary material for: p75NTR prevents the onset of cerebellar granule cell migration via RhoA activation
Source: eLife. 2022 Aug 30;11:e79934. doi: 10.7554/eLife.79934 (PMC9427104; doi:10.7554/eLife.79934)
Supplement: Figure 3—source data 2. [file elife-79934-fig3-data2.xlsx]

## Sheet: TUJ1 Process
	Ctrl	SAG	S+P1	S+P10	S+P50
exp1	193.13	141.95	152.19	138.17	166.68
exp2	194.64	116	167.33	154.54	195.15
exp3	212.72	110.74	167.12	144.88	190.22
exp4	124.78	78.58	107.99	132.76
Table Analyzed	TUJ1 Process
ANOVA summary
F	4.868
P value	0.0114
P value summary	*
Are differences among means statistically significant? (P < 0.05)	Yes
R square	0.5817
Brown-Forsythe test
F (DFn	DFd)	0.3751 (4	14)
P value	0.8226
P value summary	ns
Significantly different standard deviations? (P < 0.05)	No
Bartlett's test
Bartlett's statistic (corrected)
P value
P value summary
Significantly different standard deviations? (P < 0.05)
ANOVA table	SS	DF	MS	F (DFn	DFd)	P value
Treatment (between columns)	13371	4	3343	F (4	14) = 4.868	P = 0.0114
Residual (within columns)	9614	14	686.7
Total	22985	18
Data summary
Number of treatments (columns)	5
Number of values (total)	19
Number of families	1
Number of comparisons per family	10
Alpha	0.05
Tukey's multiple comparisons test	Mean Diff.	95% CI of diff.	Significant?	Summary
Ctrl vs. SAG	69.5	11.76 to 127.2	Yes	*
Ctrl vs. S+P1	32.66	-25.08 to 90.40	No	ns
Ctrl vs. S+P10	38.73	-19.01 to 96.47	No	ns
Ctrl vs. S+P50	-2.699	-65.06 to 59.67	No	ns
SAG vs. S+P1	-36.84	-94.58 to 20.90	No	ns
SAG vs. S+P10	-30.77	-88.51 to 26.97	No	ns
SAG vs. S+P50	-72.2	-134.6 to -9.835	Yes	*
S+P1 vs. S+P10	6.07	-51.67 to 63.81	No	ns
S+P1 vs. S+P50	-35.36	-97.72 to 27.01	No	ns
S+P10 vs. S+P50	-41.43	-103.8 to 20.94	No	ns
Test details	Mean 1	Mean 2	Mean Diff.	SE of diff.	n1	n2	q	DF
Ctrl vs. SAG	181.3	111.8	69.5	18.53	4	4	5.304	14
Ctrl vs. S+P1	181.3	148.7	32.66	18.53	4	4	2.493	14
Ctrl vs. S+P10	181.3	142.6	38.73	18.53	4	4	2.956	14
Ctrl vs. S+P50	181.3	184	-2.699	20.01	4	3	0.1907	14
SAG vs. S+P1	111.8	148.7	-36.84	18.53	4	4	2.812	14
SAG vs. S+P10	111.8	142.6	-30.77	18.53	4	4	2.348	14
SAG vs. S+P50	111.8	184	-72.2	20.01	4	3	5.102	14
S+P1 vs. S+P10	148.7	142.6	6.07	18.53	4	4	0.4633	14
S+P1 vs. S+P50	148.7	184	-35.36	20.01	4	3	2.498	14
S+P10 vs. S+P50	142.6	184	-41.43	20.01	4	3	2.927	14

## Sheet: p75-Dapi
	Ctrl	SAG	S+P1	S+P10	S+P50
exp1	1.63	23.01	13.28	1.05	1.55
exp2	1.945	25.115	7.03	7.805	7.825
exp3	1.14	31.58	5.86	2.855	5.44
exp4	3.8	12.93	13.15	4.7	2.04
Table Analyzed	p75-Dapi
ANOVA summary
F	15.72
P value	< 0.0001
P value summary	****
Are differences among means statistically significant? (P < 0.05)	Yes
R square	0.8074
Brown-Forsythe test
F (DFn	DFd)	1.828 (4	15)
P value	0.176
P value summary	ns
Significantly different standard deviations? (P < 0.05)	No
Bartlett's test
Bartlett's statistic (corrected)	8.555
P value	0.0732
P value summary	ns
Significantly different standard deviations? (P < 0.05)	No
ANOVA table	SS	DF	MS	F (DFn	DFd)	P value
Treatment (between columns)	1179	4	294.8	F (4	15) = 15.72	P < 0.0001
Residual (within columns)	281.3	15	18.75
Total	1460	19
Data summary
Number of treatments (columns)	5
Number of values (total)	20
Number of families	1
Number of comparisons per family	10
Alpha	0.05
Tukey's multiple comparisons test	Mean Diff.	95% CI of diff.	Significant?	Summary
Ctrl vs. SAG	-21.03	-30.49 to -11.57	Yes	****
Ctrl vs. S+P1	-7.701	-17.16 to 1.754	No	ns
Ctrl vs. S+P10	-1.974	-11.43 to 7.482	No	ns
Ctrl vs. S+P50	-2.085	-11.54 to 7.370	No	ns
SAG vs. S+P1	13.33	3.873 to 22.78	Yes	**
SAG vs. S+P10	19.06	9.601 to 28.51	Yes	***
SAG vs. S+P50	18.95	9.490 to 28.40	Yes	***
S+P1 vs. S+P10	5.728	-3.728 to 15.18	No	ns
S+P1 vs. S+P50	5.616	-3.839 to 15.07	No	ns
S+P10 vs. S+P50	-0.1113	-9.567 to 9.344	No	ns
Test details	Mean 1	Mean 2	Mean Diff.	SE of diff.	n1	n2	q	DF
Ctrl vs. SAG	2.129	23.16	-21.03	3.062	4	4	9.713	15
Ctrl vs. S+P1	2.129	9.83	-7.701	3.062	4	4	3.557	15
Ctrl vs. S+P10	2.129	4.103	-1.974	3.062	4	4	0.9116	15
Ctrl vs. S+P50	2.129	4.214	-2.085	3.062	4	4	0.963	15
SAG vs. S+P1	23.16	9.83	13.33	3.062	4	4	6.156	15
SAG vs. S+P10	23.16	4.103	19.06	3.062	4	4	8.801	15
SAG vs. S+P50	23.16	4.214	18.95	3.062	4	4	8.75	15
S+P1 vs. S+P10	9.83	4.103	5.728	3.062	4	4	2.645	15
S+P1 vs. S+P50	9.83	4.214	5.616	3.062	4	4	2.594	15
S+P10 vs. S+P50	4.103	4.214	-0.1113	3.062	4	4	0.05138	15

## Sheet: Ki67-Dapi
	Ctrl	SAG	S+P1	S+P10	S+P50
exp1	3.06	39.7	19.13	4.24	6.2
exp2	1.87	42.55	25.66	7.88	7.88
exp3	1.28	34.34	8.36	5.45	3.39
Table Analyzed	Ki67-Dapi
ANOVA summary
F	33.01
P value	< 0.0001
P value summary	****
Are differences among means statistically significant? (P < 0.05)	Yes
R square	0.9296
Brown-Forsythe test
F (DFn	DFd)	1.569 (4	10)
P value	0.2563
P value summary	ns
Significantly different standard deviations? (P < 0.05)	No
Bartlett's test
Bartlett's statistic (corrected)
P value
P value summary
Significantly different standard deviations? (P < 0.05)
ANOVA table	SS	DF	MS	F (DFn	DFd)	P value
Treatment (between columns)	2722	4	680.6	F (4	10) = 33.01	P < 0.0001
Residual (within columns)	206.2	10	20.62
Total	2929	14
Data summary
Number of treatments (columns)	5
Number of values (total)	15
Number of families	1
Number of comparisons per family	10
Alpha	0.05
Tukey's multiple comparisons test	Mean Diff.	95% CI of diff.	Significant?	Summary
Ctrl vs. SAG	-36.79	-49.00 to -24.59	Yes	****
Ctrl vs. S+P1	-15.65	-27.85 to -3.444	Yes	*
Ctrl vs. S+P10	-3.787	-15.99 to 8.416	No	ns
Ctrl vs. S+P50	-3.753	-15.96 to 8.449	No	ns
SAG vs. S+P1	21.15	8.944 to 33.35	Yes	**
SAG vs. S+P10	33.01	20.80 to 45.21	Yes	****
SAG vs. S+P50	33.04	20.84 to 45.24	Yes	****
S+P1 vs. S+P10	11.86	-0.3423 to 24.06	No	ns
S+P1 vs. S+P50	11.89	-0.3089 to 24.10	No	ns
S+P10 vs. S+P50	0.03333	-12.17 to 12.24	No	ns
Test details	Mean 1	Mean 2	Mean Diff.	SE of diff.	n1	n2	q	DF
Ctrl vs. SAG	2.07	38.86	-36.79	3.708	3	3	14.03	10
Ctrl vs. S+P1	2.07	17.72	-15.65	3.708	3	3	5.968	10
Ctrl vs. S+P10	2.07	5.857	-3.787	3.708	3	3	1.444	10
Ctrl vs. S+P50	2.07	5.823	-3.753	3.708	3	3	1.432	10
SAG vs. S+P1	38.86	17.72	21.15	3.708	3	3	8.066	10
SAG vs. S+P10	38.86	5.857	33.01	3.708	3	3	12.59	10
SAG vs. S+P50	38.86	5.823	33.04	3.708	3	3	12.6	10
S+P1 vs. S+P10	17.72	5.857	11.86	3.708	3	3	4.524	10
S+P1 vs. S+P50	17.72	5.823	11.89	3.708	3	3	4.536	10
S+P10 vs. S+P50	5.857	5.823	0.03333	3.708	3	3	0.01271	10
