# Supplementary material for: p75NTR prevents the onset of cerebellar granule cell migration via RhoA activation
Source: eLife. 2022 Aug 30;11:e79934. doi: 10.7554/eLife.79934 (PMC9427104; doi:10.7554/eLife.79934)
Supplement: Figure 3—source data 4. [file elife-79934-fig3-data4.xlsx]

## Sheet: WB PCNA
PACAP (uM)	0	10	50
exp1	1	1	0.72
exp2	1	0.94	0.82
exp3	1	0.57	0.36
exp4	1	0.756	0.7153
Table Analyzed	PCNA % Shh
ANOVA summary
F	4.586
P value	0.0423
P value summary	*
Are differences among means statistically significant? (P < 0.05)	Yes
R square	0.5047
Brown-Forsythe test
F (DFn	DFd)	2.147 (2	9)
P value	0.1729
P value summary	ns
Significantly different standard deviations? (P < 0.05)	No
Bartlett's test
Bartlett's statistic (corrected)	#NAME?
P value	< 0.0001
P value summary	****
Significantly different standard deviations? (P < 0.05)	Yes
ANOVA table	SS	DF	MS	F (DFn	DFd)	P value
Treatment (between columns)	0.24	2	0.12	F (2	9) = 4.586	P = 0.0423
Residual (within columns)	0.2355	9	0.02616
Total	0.4754	11
Data summary
Number of treatments (columns)	3
Number of values (total)	12
Number of families	1
Number of comparisons per family	2
Alpha	0.05
Dunnett's multiple comparisons test	Mean Diff.	95% CI of diff.	Significant?	Summary
0 vs. 10	0.1835	-0.1155 to 0.4825	No	ns
0 vs. 50	0.3462	0.04719 to 0.6452	Yes	*
Test details	Mean 1	Mean 2	Mean Diff.	SE of diff.	n1	n2	q	DF
0 vs. 10	1	0.8165	0.1835	0.1144	4	4	1.604	9
0 vs. 50	1	0.6538	0.3462	0.1144	4	4	3.027	9

## Sheet: WB p75
PACAP (uM)	0	10	50
exp1	1	0.76	0.7
exp2	1	0.57	0.39
exp3	1	0.8451	0.6787
exp4	1	1	0.8235
Table Analyzed	p75 % Shh
ANOVA summary
F	5.703
P value	0.0251
P value summary	*
Are differences among means statistically significant? (P < 0.05)	Yes
R square	0.559
Brown-Forsythe test
F (DFn	DFd)	2.063 (2	9)
P value	0.183
P value summary	ns
Significantly different standard deviations? (P < 0.05)	No
Bartlett's test
Bartlett's statistic (corrected)	#NAME?
P value	< 0.0001
P value summary	****
Significantly different standard deviations? (P < 0.05)	Yes
ANOVA table	SS	DF	MS	F (DFn	DFd)	P value
Treatment (between columns)	0.2502	2	0.1251	F (2	9) = 5.703	P = 0.0251
Residual (within columns)	0.1974	9	0.02193
Total	0.4476	11
Data summary
Number of treatments (columns)	3
Number of values (total)	12
Number of families	1
Number of comparisons per family	2
Alpha	0.05
Dunnett's multiple comparisons test	Mean Diff.	95% CI of diff.	Significant?	Summary
0 vs. 10	0.2062	-0.06752 to 0.4800	No	ns
0 vs. 50	0.352	0.07820 to 0.6257	Yes	*
Test details	Mean 1	Mean 2	Mean Diff.	SE of diff.	n1	n2	q	DF
0 vs. 10	1	0.7938	0.2062	0.1047	4	4	1.969	9
0 vs. 50	1	0.6481	0.352	0.1047	4	4	3.361	9
