# Supplementary material for: p75NTR prevents the onset of cerebellar granule cell migration via RhoA activation
Source: eLife. 2022 Aug 30;11:e79934. doi: 10.7554/eLife.79934 (PMC9427104; doi:10.7554/eLife.79934)
Supplement: Figure 4—source data 3. [file elife-79934-fig4-data3.xlsx]

## Sheet: PCNA
	No Trans				Ctrl-GFP				p75-GFP
Ctrl 48h	0.37	0.11	0.05	0.29	0.19	0.17	0.07	0.39	0.25	0.17	0.09	0.22
Ctrl+SAG 24h	0.38	0.19	0.06	0.3	0.28	0.11	0.07	0.45	0.17	0.14	0.08	0.25
SAG 48h	0.93	0.9	0.34	1.09	1.02	0.74	0.21	1.02	0.75	0.73	0.15	0.82
Table Analyzed	PCNA
Two-way ANOVA	Ordinary
Alpha	0.05
Source of Variation	% of total variation	P value	P value summary	Significant?
Interaction	0.972	0.9484	ns	No
SAG	60.17	< 0.0001	****	Yes
p75	1.765	0.5339	ns	No
ANOVA table	SS	DF	MS	F (DFn	DFd)	P value
Interaction	0.03534	4	0.008836	F (4	27) = 0.1769	P = 0.9484
SAG	2.188	2	1.094	F (2	27) = 21.90	P < 0.0001
p75	0.06417	2	0.03209	F (2	27) = 0.6424	P = 0.5339
Residual	1.349	27	0.04995
Number of missing values	0
Within each column	compare rows (simple effects within columns)
Number of families	3
Number of comparisons per family	3
Alpha	0.05
Sidak's multiple comparisons test	Mean Diff.	95% CI of diff.	Significant?	Summary
No Trans
Ctrl 48h vs. Ctrl+SAG 24h	-0.0275	-0.4297 to 0.3747	No	ns
Ctrl 48h vs. SAG 48h	-0.61	-1.012 to -0.2078	Yes	**
Ctrl+SAG 24h vs. SAG 48h	-0.5825	-0.9847 to -0.1803	Yes	**
Ctrl-GFP
Ctrl 48h vs. Ctrl+SAG 24h	-0.0225	-0.4247 to 0.3797	No	ns
Ctrl 48h vs. SAG 48h	-0.5425	-0.9447 to -0.1403	Yes	**
Ctrl+SAG 24h vs. SAG 48h	-0.52	-0.9222 to -0.1178	Yes	**
p75-GFP
Ctrl 48h vs. Ctrl+SAG 24h	0.0225	-0.3797 to 0.4247	No	ns
Ctrl 48h vs. SAG 48h	-0.43	-0.8322 to -0.02779	Yes	*
Ctrl+SAG 24h vs. SAG 48h	-0.4525	-0.8547 to -0.05029	Yes	*
Test details	Mean 1	Mean 2	Mean Diff.	SE of diff.	N1	N2	t	DF
No Trans
Ctrl 48h vs. Ctrl+SAG 24h	0.205	0.2325	-0.0275	0.158	4	4	0.174	27
Ctrl 48h vs. SAG 48h	0.205	0.815	-0.61	0.158	4	4	3.86	27
Ctrl+SAG 24h vs. SAG 48h	0.2325	0.815	-0.5825	0.158	4	4	3.686	27
Ctrl-GFP
Ctrl 48h vs. Ctrl+SAG 24h	0.205	0.2275	-0.0225	0.158	4	4	0.1424	27
Ctrl 48h vs. SAG 48h	0.205	0.7475	-0.5425	0.158	4	4	3.433	27
Ctrl+SAG 24h vs. SAG 48h	0.2275	0.7475	-0.52	0.158	4	4	3.29	27
p75-GFP
Ctrl 48h vs. Ctrl+SAG 24h	0.1825	0.16	0.0225	0.158	4	4	0.1424	27
Ctrl 48h vs. SAG 48h	0.1825	0.6125	-0.43	0.158	4	4	2.721	27
Ctrl+SAG 24h vs. SAG 48h	0.16	0.6125	-0.4525	0.158	4	4	2.863	27

## Sheet: p75
		No Trans				Ctrl-GFP				p75-GFP
	Ctrl 48h	0.07	0.08	0.08	0.13	0.12	0.12	0.04	0.16	0.23	0.36	0.14	0.36
	Ctrl+SAG 24h	0.12	0.11	0.16	0.15	0.17	0.17	0.11	0.23	0.18	0.39	0.19	0.47
	SAG 48h	1.71	1.78	0.8	0.99	1.51	1.4	0.55	1.21	1.45	1.62	0.48	1.42
Table Analyzed	p75
Two-way ANOVA	Ordinary
Alpha	0.05
Source of Variation	% of total variation	P value	P value summary	Significant?
Interaction	0.8055	0.8874	ns	No
SAG	78.99	< 0.0001	****	Yes
p75	0.8817	0.5476	ns	No
ANOVA table	SS	DF	MS	F (DFn	DFd)	P value
Interaction	0.09223	4	0.02306	F (4	27) = 0.2814	P = 0.8874
SAG	9.044	2	4.522	F (2	27) = 55.18	P < 0.0001
p75	0.101	2	0.05048	F (2	27) = 0.6159	P = 0.5476
Residual	2.213	27	0.08195
Number of missing values	0
Within each column	compare rows (simple effects within columns)
Number of families	3
Number of comparisons per family	3
Alpha	0.05
Tukey's multiple comparisons test	Mean Diff.	95% CI of diff.	Significant?	Summary
No Trans
Ctrl 48h vs. Ctrl+SAG 24h	-0.045	-0.5469 to 0.4569	No	ns
Ctrl 48h vs. SAG 48h	-1.23	-1.732 to -0.7281	Yes	****
Ctrl+SAG 24h vs. SAG 48h	-1.185	-1.687 to -0.6831	Yes	****
Ctrl-GFP
Ctrl 48h vs. Ctrl+SAG 24h	-0.06	-0.5619 to 0.4419	No	ns
Ctrl 48h vs. SAG 48h	-1.058	-1.559 to -0.5556	Yes	****
Ctrl+SAG 24h vs. SAG 48h	-0.9975	-1.499 to -0.4956	Yes	***
p75-GFP
Ctrl 48h vs. Ctrl+SAG 24h	-0.035	-0.5369 to 0.4669	No	ns
Ctrl 48h vs. SAG 48h	-0.97	-1.472 to -0.4681	Yes	***
Ctrl+SAG 24h vs. SAG 48h	-0.935	-1.437 to -0.4331	Yes	***
Test details	Mean 1	Mean 2	Mean Diff.	SE of diff.	N1	N2	q	DF
No Trans
Ctrl 48h vs. Ctrl+SAG 24h	0.09	0.135	-0.045	0.2024	4	4	0.3144	27
Ctrl 48h vs. SAG 48h	0.09	1.32	-1.23	0.2024	4	4	8.593	27
Ctrl+SAG 24h vs. SAG 48h	0.135	1.32	-1.185	0.2024	4	4	8.279	27
Ctrl-GFP
Ctrl 48h vs. Ctrl+SAG 24h	0.11	0.17	-0.06	0.2024	4	4	0.4192	27
Ctrl 48h vs. SAG 48h	0.11	1.168	-1.058	0.2024	4	4	7.388	27
Ctrl+SAG 24h vs. SAG 48h	0.17	1.168	-0.9975	0.2024	4	4	6.969	27
p75-GFP
Ctrl 48h vs. Ctrl+SAG 24h	0.2725	0.3075	-0.035	0.2024	4	4	0.2445	27
Ctrl 48h vs. SAG 48h	0.2725	1.243	-0.97	0.2024	4	4	6.777	27
Ctrl+SAG 24h vs. SAG 48h	0.3075	1.243	-0.935	0.2024	4	4	6.532	27
