# Supplementary material for: p75NTR prevents the onset of cerebellar granule cell migration via RhoA activation
Source: eLife. 2022 Aug 30;11:e79934. doi: 10.7554/eLife.79934 (PMC9427104; doi:10.7554/eLife.79934)
Supplement: Figure 5—source data 1. [file elife-79934-fig5-data1.xlsx]

## Sheet: Copy of WT vs KO
	WT	p75 -/-
exp 1	105	288
exp 2	180	348
exp 3	233	243
exp 4	121	299
Table Analyzed	Copy of WT vs KO
Column B	p75 -/-
vs.	vs.
Column A	WT
Unpaired t test
P value	0.01
P value summary	**
Significantly different? (P < 0.05)	Yes
One- or two-tailed P value?	Two-tailed
t	df	t=3.707 df=6
How big is the difference?
Mean ± SEM of column A	159.8 ± 29.26 N=4
Mean ± SEM of column B	294.5 ± 21.56 N=4
Difference between means	134.8 ± 36.35
95% confidence interval	45.82 to 223.7
R square	0.6961
F test to compare variances
F	DFn	Dfd	1.842	3	3
P value	0.6283
P value summary	ns
Significantly different? (P < 0.05)	No
