# Supplementary material for: p75NTR prevents the onset of cerebellar granule cell migration via RhoA activation
Source: eLife. 2022 Aug 30;11:e79934. doi: 10.7554/eLife.79934 (PMC9427104; doi:10.7554/eLife.79934)
Supplement: Figure 5—source data 2. [file elife-79934-fig5-data2.xlsx]

## Sheet: Dapi
	Ctrl				BDNF
NT	143	180	171	165	215	235	324	252
Shh	130	189	170	145	139	180	197	138
Table Analyzed	Data 1
Two-way ANOVA	Ordinary
Alpha	0.05
Source of Variation	% of total variation	P value	P value summary	Significant?
Interaction	19.32	0.0186	*	Yes
Shh	25.29	0.009	**	Yes
BDNF	24.04	0.0104	*	Yes
ANOVA table	SS	DF	MS	F (DFn	DFd)	P value
Interaction	7526	1	7526	F (1	12) = 7.397	P = 0.0186
Shh	9851	1	9851	F (1	12) = 9.683	P = 0.0090
BDNF	9361	1	9361	F (1	12) = 9.201	P = 0.0104
Residual	12208	12	1017
Number of missing values	0
Compare cell means regardless of rows and columns
Number of families	1
Number of comparisons per family	6
Alpha	0.05
Tukey's multiple comparisons test	Mean Diff.	95% CI of diff.	Significant?	Summary
NT:Ctrl vs. NT:BDNF	-91.75	-158.7 to -24.79	Yes	**
NT:Ctrl vs. Shh:Ctrl	6.25	-60.71 to 73.21	No	ns
NT:Ctrl vs. Shh:BDNF	1.25	-65.71 to 68.21	No	ns
NT:BDNF vs. Shh:Ctrl	98	31.04 to 165.0	Yes	**
NT:BDNF vs. Shh:BDNF	93	26.04 to 160.0	Yes	**
Shh:Ctrl vs. Shh:BDNF	-5	-71.96 to 61.96	No	ns
Test details	Mean 1	Mean 2	Mean Diff.	SE of diff.	N1	N2	q	DF
NT:Ctrl vs. NT:BDNF	164.8	256.5	-91.75	22.55	4	4	5.753	12
NT:Ctrl vs. Shh:Ctrl	164.8	158.5	6.25	22.55	4	4	0.3919	12
NT:Ctrl vs. Shh:BDNF	164.8	163.5	1.25	22.55	4	4	0.07838	12
NT:BDNF vs. Shh:Ctrl	256.5	158.5	98	22.55	4	4	6.145	12
NT:BDNF vs. Shh:BDNF	256.5	163.5	93	22.55	4	4	5.832	12
Shh:Ctrl vs. Shh:BDNF	158.5	163.5	-5	22.55	4	4	0.3135	12
