# Supplementary material for: p75NTR prevents the onset of cerebellar granule cell migration via RhoA activation
Source: eLife. 2022 Aug 30;11:e79934. doi: 10.7554/eLife.79934 (PMC9427104; doi:10.7554/eLife.79934)
Supplement: Figure 5—source data 3. [file elife-79934-fig5-data3.xlsx]

## Sheet: GFP 2
	N.T.				BDNF
Ctrl-GFP	3.52	3.12	3.66	2.77	7.48	7.84	5.69	5.99
p75-GFP	1.44	3.53	3.26	2.27	4.09	3.3	3.59	3.38
Table Analyzed	GFP 2
Two-way ANOVA	Ordinary
Alpha	0.05
Source of Variation	% of total variation	P value	P value summary	Significant?
Interaction	13.31	0.0065	**	Yes
Treatment	30.37	0.0003	***	Yes
Transfection	41.54	< 0.0001	****	Yes
ANOVA table	SS	DF	MS	F (DFn	DFd)	P value
Interaction	6.338	1	6.338	F (1	12) = 10.80	P = 0.0065
Treatment	14.46	1	14.46	F (1	12) = 24.65	P = 0.0003
Transfection	19.78	1	19.78	F (1	12) = 33.72	P < 0.0001
Residual	7.04	12	0.5867
Number of missing values	0
Compare cell means regardless of rows and columns
Number of families	1
Number of comparisons per family	6
Alpha	0.05
Tukey's multiple comparisons test	Mean Diff.	95% CI of diff.	Significant?	Summary
Ctrl-GFP:N.T. vs. Ctrl-GFP:BDNF	-3.483	-5.090 to -1.875	Yes	***
Ctrl-GFP:N.T. vs. p75-GFP:N.T.	0.6425	-0.9655 to 2.250	No	ns
Ctrl-GFP:N.T. vs. p75-GFP:BDNF	-0.3225	-1.930 to 1.285	No	ns
Ctrl-GFP:BDNF vs. p75-GFP:N.T.	4.125	2.517 to 5.733	Yes	****
Ctrl-GFP:BDNF vs. p75-GFP:BDNF	3.16	1.552 to 4.768	Yes	***
p75-GFP:N.T. vs. p75-GFP:BDNF	-0.965	-2.573 to 0.6430	No	ns
Test details	Mean 1	Mean 2	Mean Diff.	SE of diff.	N1	N2	q	DF
Ctrl-GFP:N.T. vs. Ctrl-GFP:BDNF	3.268	6.75	-3.483	0.5416	4	4	9.093	12
Ctrl-GFP:N.T. vs. p75-GFP:N.T.	3.268	2.625	0.6425	0.5416	4	4	1.678	12
Ctrl-GFP:N.T. vs. p75-GFP:BDNF	3.268	3.59	-0.3225	0.5416	4	4	0.8421	12
Ctrl-GFP:BDNF vs. p75-GFP:N.T.	6.75	2.625	4.125	0.5416	4	4	10.77	12
Ctrl-GFP:BDNF vs. p75-GFP:BDNF	6.75	3.59	3.16	0.5416	4	4	8.251	12
p75-GFP:N.T. vs. p75-GFP:BDNF	2.625	3.59	-0.965	0.5416	4	4	2.52	12
