# Supplementary material for: p75NTR prevents the onset of cerebellar granule cell migration via RhoA activation
Source: eLife. 2022 Aug 30;11:e79934. doi: 10.7554/eLife.79934 (PMC9427104; doi:10.7554/eLife.79934)
Supplement: Figure 6—source data 1. [file elife-79934-fig6-data1.xlsx]

## Sheet: EdU quantification in L5
WT	p75fl/fl;Atoh1Cre
105	305
106	333
103	274
218	370
260	292
158	338
	322
	329
Table Analyzed	L5 WT vs Atoh1
Column B	p75fl/fl;Atoh1Cre
vs.	vs.
Column A	WT
Unpaired t test
P value	< 0.0001
P value summary	****
Significantly different? (P < 0.05)	Yes
One- or two-tailed P value?	Two-tailed
t	df	t=6.131 df=12
How big is the difference?
Mean ± SEM of column A	158.3 ± 27.41 N=6
Mean ± SEM of column B	320.4 ± 10.52 N=8
Difference between means	162.0 ± 26.43
95% confidence interval	104.5 to 219.6
R square	0.758
F test to compare variances
F	DFn	Dfd	5.088	5	7
P value	0.055
P value summary	ns
Significantly different? (P < 0.05)	No

## Sheet: EdU Quantification in L6
WT	p75fl/fl;Atoh1Cre
209	349
188	417
190	385
311	419
303	442
296	413
	421
	375
Table Analyzed	L6 WT vs Atoh1
Column B	p75fl/fl;Atoh1Cre
vs.	vs.
Column A	WT
Unpaired t test
P value	< 0.0001
P value summary	****
Significantly different? (P < 0.05)	Yes
One- or two-tailed P value?	Two-tailed
t	df	t=6.315 df=12
How big is the difference?
Mean ± SEM of column A	249.5 ± 24.34 N=6
Mean ± SEM of column B	402.6 ± 10.71 N=8
Difference between means	153.1 ± 24.25
95% confidence interval	100.3 to 206.0
R square	0.7687
F test to compare variances
F	DFn	Dfd	3.875	5	7
P value	0.1058
P value summary	ns
Significantly different? (P < 0.05)	No

## Sheet: EdU Quantification in L9
WT	p75fl/fl;Atoh1Cre
172	321
116	372
158	298
177	330
266	290
152	359
	241
	366
Table Analyzed	L9 WT vs Atoh1
Column B	p75fl/fl;Atoh1Cre
vs.	vs.
Column A	WT
Unpaired t test
P value	< 0.0001
P value summary	****
Significantly different? (P < 0.05)	Yes
One- or two-tailed P value?	Two-tailed
t	df	t=5.844 df=12
How big is the difference?
Mean ± SEM of column A	173.5 ± 20.48 N=6
Mean ± SEM of column B	322.1 ± 15.83 N=8
Difference between means	148.6 ± 25.43
95% confidence interval	93.21 to 204.0
R square	0.74
F test to compare variances
F	DFn	Dfd	1.255	5	7
P value	0.7554
P value summary	ns
Significantly different? (P < 0.05)	No
