# Supplementary material for: p75NTR prevents the onset of cerebellar granule cell migration via RhoA activation
Source: eLife. 2022 Aug 30;11:e79934. doi: 10.7554/eLife.79934 (PMC9427104; doi:10.7554/eLife.79934)
Supplement: Figure 6—source data 2. [file elife-79934-fig6-data2.xlsx]

## Sheet: L5 Wt vs Atoh1
WT	p75fl/fl;Atoh1Cre
1950	2402
1964	2248
1318	2368
1545	2435
2286	2066
1781	2011
2238	2803
2737	2503
2067	2502
Table Analyzed	L5 Wt vs Atoh1
Column B	p75fl/fl;Atoh1Cre
vs.	vs.
Column A	WT
Unpaired t test
P value	0.0302
P value summary	*
Significantly different? (P < 0.05)	Yes
One- or two-tailed P value?	Two-tailed
t	df	t=2.378 df=16
How big is the difference?
Mean ± SEM of column A	1987 ± 139.9 N=9
Mean ± SEM of column B	2371 ± 80.28 N=9
Difference between means	383.6 ± 161.3
95% confidence interval	41.68 to 725.4
R square	0.2612
F test to compare variances
F	DFn	Dfd	3.036	8	8
P value	0.1371
P value summary	ns
Significantly different? (P < 0.05)	No

## Sheet: L6 Wt vs Atoh1
WT	p75fl/fl;Atoh1Cre
1988	2371
2141	2319
1535	2343
1766	2152
2019	2445
1747	2845
2212	2137
2371	2377
2144	1989
Table Analyzed	L6 WT vs Atoh1
Column B	p75fl/fl;Atoh1Cre
vs.	vs.
Column A	WT
Unpaired t test
P value	0.0117
P value summary	*
Significantly different? (P < 0.05)	Yes
One- or two-tailed P value?	Two-tailed
t	df	t=2.844 df=16
How big is the difference?
Mean ± SEM of column A	1991 ± 88.04 N=9
Mean ± SEM of column B	2331 ± 80.61 N=9
Difference between means	339.4 ± 119.4
95% confidence interval	86.40 to 592.5
R square	0.3357
F test to compare variances
F	DFn	Dfd	1.193	8	8
P value	0.8091
P value summary	ns
Significantly different? (P < 0.05)	No

## Sheet: L9 Wt vs Atoh1
WT	p75fl/fl;Atoh1Cre
1662	2463
1394	2695
1539	2465
1685	2757
2142	2172
1764	2708
2286	2696
2657	2693
2194	2217
Table Analyzed	L9 WT vs Atoh1
Column B	p75fl/fl;Atoh1Cre
vs.	vs.
Column A	WT
Unpaired t test
P value	0.0012
P value summary	**
Significantly different? (P < 0.05)	Yes
One- or two-tailed P value?	Two-tailed
t	df	t=3.931 df=16
How big is the difference?
Mean ± SEM of column A	1925 ± 137.9 N=9
Mean ± SEM of column B	2541 ± 74.39 N=9
Difference between means	615.9 ± 156.7
95% confidence interval	283.7 to 948.0
R square	0.4913
F test to compare variances
F	DFn	Dfd	3.437	8	8
P value	0.1001
P value summary	ns
Significantly different? (P < 0.05)	No
