# Supplementary material for: p75NTR prevents the onset of cerebellar granule cell migration via RhoA activation
Source: eLife. 2022 Aug 30;11:e79934. doi: 10.7554/eLife.79934 (PMC9427104; doi:10.7554/eLife.79934)
Supplement: Figure 6—source data 3. [file elife-79934-fig6-data3.xlsx]

## Sheet: EdU+Ki67area
	WT			Atoh1 Cre
Lobe 5	9.87	6.82	0	9.21	3.07	10.65
Lobe 6	6.78	7.52	8.85	7.4	5.84	6.92
Lobe 9	5.99	8.52	6.33	5.63	5.59	8.56
Table Analyzed	EdU+Ki67/Area
Two-way ANOVA	Ordinary
Alpha	0.05
Source of Variation	% of total variation	P value	P value summary	Significant?
Interaction	7.459	0.6238	ns	No
Lobe	1.146	0.9278	ns	No
Genotype	0.2516	0.8586	ns	No
ANOVA table	SS	DF	MS	F (DFn	DFd)	P value
Interaction	7.9	2	3.95	F (2	12) = 0.4910	P = 0.6238
Lobe	1.214	2	0.607	F (2	12) = 0.07545	P = 0.9278
Genotype	0.2665	1	0.2665	F (1	12) = 0.03312	P = 0.8586
Residual	96.54	12	8.045
Number of missing values	0
Compare each cell mean with the other cell mean in that row.
Number of families	1
Number of comparisons per family	3
Alpha	0.05
Sidak's multiple comparisons test	Mean Diff.	95% CI of diff.	Significant?	Summary
WT - Atoh1 Cre
Lobe 5	-2.08	-8.496 to 4.336	No	ns
Lobe 6	0.9967	-5.419 to 7.412	No	ns
Lobe 9	0.3533	-6.062 to 6.769	No	ns
Test details	Mean 1	Mean 2	Mean Diff.	SE of diff.	N1	N2	t	DF
WT - Atoh1 Cre
Lobe 5	5.563	7.643	-2.08	2.316	3	3	0.8982	12
Lobe 6	7.717	6.72	0.9967	2.316	3	3	0.4304	12
Lobe 9	6.947	6.593	0.3533	2.316	3	3	0.1526	12
