# Supplementary material for: p75NTR prevents the onset of cerebellar granule cell migration via RhoA activation
Source: eLife. 2022 Aug 30;11:e79934. doi: 10.7554/eLife.79934 (PMC9427104; doi:10.7554/eLife.79934)
Supplement: Figure 7—source data 1. [file elife-79934-fig7-data1.xlsx]

## Sheet: WT y KO G-Lisa
WT	p75-/-
1.26585	0.658044
1.02928	0.631027
0.865602	0.422223
1.09241	0.729639
Table Analyzed	WT y KO data
Column B	p75-/-
vs.	vs.
Column A	WT
Unpaired t test
P value	0.0052
P value summary	**
Significantly different? (P < 0.05)	Yes
One- or two-tailed P value?	Two-tailed
t	df	t=4.280 df=6
How big is the difference?
Mean ± SEM of column A	1.063 ± 0.08272 N=4
Mean ± SEM of column B	0.6102 ± 0.06603 N=4
Difference between means	-0.4531 ± 0.1058
95% confidence interval	-0.7120 to -0.1941
R square	0.7533
F test to compare variances
F	DFn	Dfd	1.569	3	3
P value	0.7202
P value summary	ns
Significantly different? (P < 0.05)	No
