# Supplementary material for: p75NTR prevents the onset of cerebellar granule cell migration via RhoA activation
Source: eLife. 2022 Aug 30;11:e79934. doi: 10.7554/eLife.79934 (PMC9427104; doi:10.7554/eLife.79934)
Supplement: Figure 7—source data 2. [file elife-79934-fig7-data2.xlsx]

## Sheet: QTX with Y27632
	NT						BDNF
0	131	135	185	134	147	114	186	263	266	196	180	219
1	164	141	175	144	167	116	180	261	174	196	169	221
10		191	261	249	160	186		241	267	213	213	193
50		217	192	207	221	189		316	226	213	247	251
		Table Analyzed	QTX with Y27632
		Two-way ANOVA	Ordinary
		Alpha	0.05
		Source of Variation	% of total variation	P value	P value summary	Significant?
		Interaction	5.705	0.1879	ns	No
		Y27632	25.12	0.0005	***	Yes
		BDNF	26.57	< 0.0001	****	Yes
		ANOVA table	SS	DF	MS	F (DFn	DFd)	P value
		Interaction	5159	3	1720	F (3	36) = 1.683	P = 0.1879
		Y27632	22722	3	7574	F (3	36) = 7.413	P = 0.0005
		BDNF	24030	1	24030	F (1	36) = 23.52	P < 0.0001
		Residual	36783	36	1022
		Number of missing values	4
		Compare cell means regardless of rows and columns
		Number of families	1
		Number of comparisons per family	28
		Alpha	0.05
		Tukey's multiple comparisons test	Mean Diff.	95% CI of diff.	Significant?	Summary
		0:NT vs. 0:BDNF	-77.33	-136.7 to -17.99	Yes	**
		0:NT vs. 1:NT	-10.17	-69.51 to 49.17	No	ns
		0:NT vs. 1:BDNF	-59.17	-118.5 to 0.1745	No	ns
		0:NT vs. 10:NT	-68.4	-130.6 to -6.162	Yes	*
		0:NT vs. 10:BDNF	-84.4	-146.6 to -22.16	Yes	**
		0:NT vs. 50:NT	-64.2	-126.4 to -1.962	Yes	*
		0:NT vs. 50:BDNF	-109.6	-171.8 to -47.36	Yes	****
		0:BDNF vs. 1:NT	67.17	7.826 to 126.5	Yes	*
		0:BDNF vs. 1:BDNF	18.17	-41.17 to 77.51	No	ns
		0:BDNF vs. 10:NT	8.933	-53.30 to 71.17	No	ns
		0:BDNF vs. 10:BDNF	-7.067	-69.30 to 55.17	No	ns
		0:BDNF vs. 50:NT	13.13	-49.10 to 75.37	No	ns
		0:BDNF vs. 50:BDNF	-32.27	-94.50 to 29.97	No	ns
		1:NT vs. 1:BDNF	-49	-108.3 to 10.34	No	ns
		1:NT vs. 10:NT	-58.23	-120.5 to 4.004	No	ns
		1:NT vs. 10:BDNF	-74.23	-136.5 to -12.00	Yes	*
		1:NT vs. 50:NT	-54.03	-116.3 to 8.204	No	ns
		1:NT vs. 50:BDNF	-99.43	-161.7 to -37.20	Yes	***
		1:BDNF vs. 10:NT	-9.233	-71.47 to 53.00	No	ns
		1:BDNF vs. 10:BDNF	-25.23	-87.47 to 37.00	No	ns
		1:BDNF vs. 50:NT	-5.033	-67.27 to 57.20	No	ns
		1:BDNF vs. 50:BDNF	-50.43	-112.7 to 11.80	No	ns
		10:NT vs. 10:BDNF	-16	-81.00 to 49.00	No	ns
		10:NT vs. 50:NT	4.2	-60.80 to 69.20	No	ns
		10:NT vs. 50:BDNF	-41.2	-106.2 to 23.80	No	ns
		10:BDNF vs. 50:NT	20.2	-44.80 to 85.20	No	ns
		10:BDNF vs. 50:BDNF	-25.2	-90.20 to 39.80	No	ns
		50:NT vs. 50:BDNF	-45.4	-110.4 to 19.60	No	ns
		Test details	Mean 1	Mean 2	Mean Diff.	SE of diff.	N1	N2	q	DF
		0:NT vs. 0:BDNF	141	218.3	-77.33	18.46	6	6	5.926	36
		0:NT vs. 1:NT	141	151.2	-10.17	18.46	6	6	0.7791	36
		0:NT vs. 1:BDNF	141	200.2	-59.17	18.46	6	6	4.534	36
		0:NT vs. 10:NT	141	209.4	-68.4	19.36	6	5	4.998	36
		0:NT vs. 10:BDNF	141	225.4	-84.4	19.36	6	5	6.167	36
		0:NT vs. 50:NT	141	205.2	-64.2	19.36	6	5	4.691	36
		0:NT vs. 50:BDNF	141	250.6	-109.6	19.36	6	5	8.008	36
		0:BDNF vs. 1:NT	218.3	151.2	67.17	18.46	6	6	5.147	36
		0:BDNF vs. 1:BDNF	218.3	200.2	18.17	18.46	6	6	1.392	36
		0:BDNF vs. 10:NT	218.3	209.4	8.933	19.36	6	5	0.6527	36
		0:BDNF vs. 10:BDNF	218.3	225.4	-7.067	19.36	6	5	0.5163	36
		0:BDNF vs. 50:NT	218.3	205.2	13.13	19.36	6	5	0.9596	36
		0:BDNF vs. 50:BDNF	218.3	250.6	-32.27	19.36	6	5	2.358	36
		1:NT vs. 1:BDNF	151.2	200.2	-49	18.46	6	6	3.755	36
		1:NT vs. 10:NT	151.2	209.4	-58.23	19.36	6	5	4.255	36
		1:NT vs. 10:BDNF	151.2	225.4	-74.23	19.36	6	5	5.424	36
		1:NT vs. 50:NT	151.2	205.2	-54.03	19.36	6	5	3.948	36
		1:NT vs. 50:BDNF	151.2	250.6	-99.43	19.36	6	5	7.265	36
		1:BDNF vs. 10:NT	200.2	209.4	-9.233	19.36	6	5	0.6746	36
		1:BDNF vs. 10:BDNF	200.2	225.4	-25.23	19.36	6	5	1.844	36
		1:BDNF vs. 50:NT	200.2	205.2	-5.033	19.36	6	5	0.3678	36
		1:BDNF vs. 50:BDNF	200.2	250.6	-50.43	19.36	6	5	3.685	36
		10:NT vs. 10:BDNF	209.4	225.4	-16	20.22	5	5	1.119	36
		10:NT vs. 50:NT	209.4	205.2	4.2	20.22	5	5	0.2938	36
		10:NT vs. 50:BDNF	209.4	250.6	-41.2	20.22	5	5	2.882	36
		10:BDNF vs. 50:NT	225.4	205.2	20.2	20.22	5	5	1.413	36
		10:BDNF vs. 50:BDNF	225.4	250.6	-25.2	20.22	5	5	1.763	36
		50:NT vs. 50:BDNF	205.2	250.6	-45.4	20.22	5	5	3.176	36
